# Supplementary material
Source: PubMed Central journal article supplement (PMC6885403)
Supplement: JZUSB20-1021-ESM.pdf [file JZUSB20-1021-ESM.pdf]

# **Mycoplasma contamination-mediated attenuation of plasmid DNA transfection efficiency is augmented via L-arginine deprivation in HEK-293 cells**

Zi-fei YIN<sup>1</sup>, Ya-ni ZHANG<sup>1</sup>, Shu-fang LIANG<sup>1</sup>, Sha-sha ZHAO<sup>1,2</sup>, Juan DU<sup>1</sup>, Bin-bin CHENG<sup>†‡1</sup>

<sup>1</sup>*Department of Traditional Chinese Medicine, Changhai Hospital, Second Military Medical University, Shanghai 200433, China*

<sup>2</sup>*Graduate School of Shanghai University of Traditional Chinese Medicine, Shanghai 201203, China*

‡ Corresponding author, †E-mail: cbb8202@smmu.edu.cn

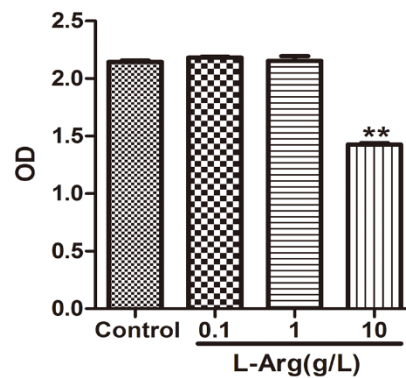

**Fig. S1 Cytotoxicity of L-arginine in HEK-293 cells**

Mycoplasma-contaminated HEK-293 cells ( $5 \times 10^4$ /well) were seeded in 96-well plate and treated with L-arginine at the indicated dosage. Seventy-two hours later, cell viability was measured by MTT assay
